# Supplementary material for: Glutathione-facilitated design and fabrication of gold nanoparticle-based logic gates and keypad lock
Source: Royal Society of Chemistry journal article supplement (doi:10.1039/c4nr01615g), 2014-01-01
Supplement: c4nr01615g1.pdf [file c4nr01615g1.pdf]

## Supplementary Information

Glutathione-facilitated design and fabrication of gold nanoparticles-  
based logic gates and keypad lock

*Zhenzhen Huang, Haonan Wang, Wensheng Yang\**

State Key Laboratory of Supramolecular Structure and Materials, College of  
Chemistry, Jilin University, Changchun 130012, People's Republic of China

E-mail: [wsyang@mail.jlu.edu.cn](mailto:wsyang@mail.jlu.edu.cn)

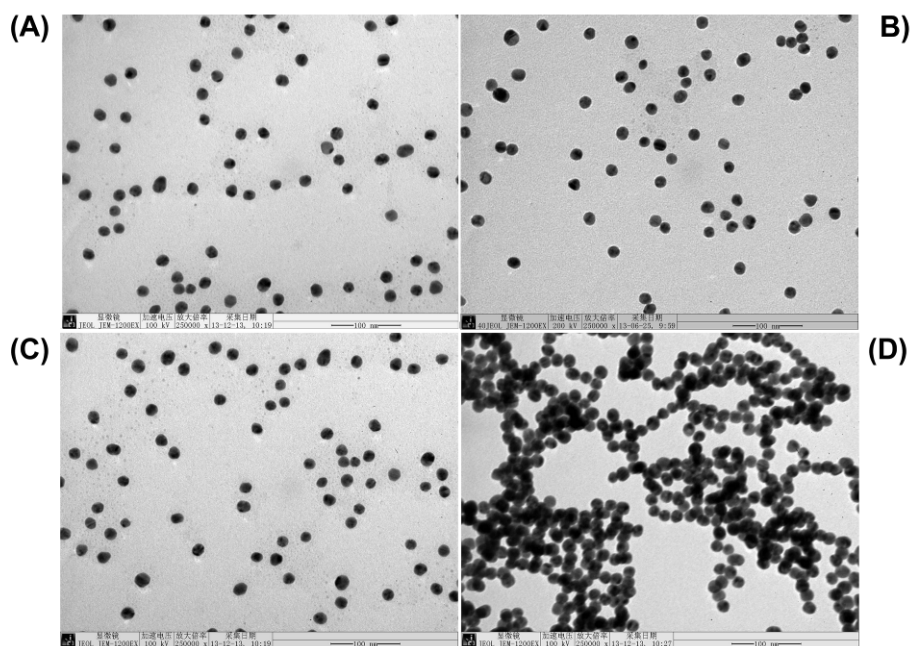

**Figure S1** TEM image of a) gold NPs alone, b) gold NPs + GSH, c) gold NPs +  $Pb^{2+}$  ions and d) gold NP + GSH +  $Pb^{2+}$  ions.

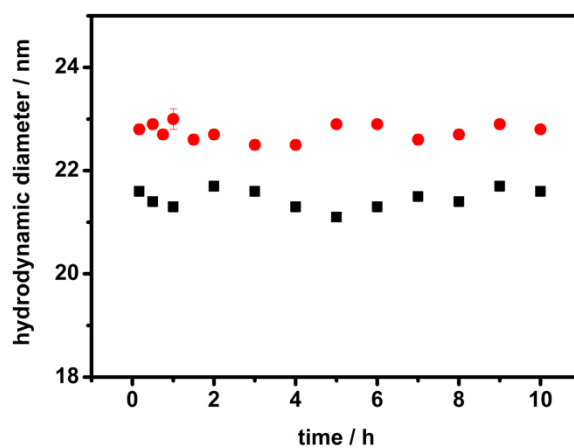

**Figure S2** The DLS particle size of gold NPs alone (squares) and gold NPs +GSH (circles) incubated for various times.

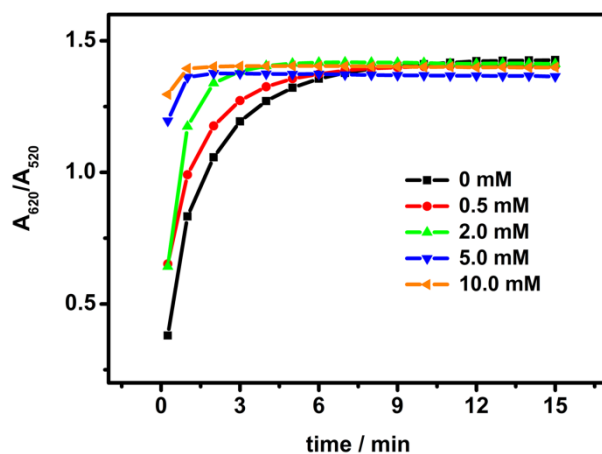

**Figure S3** The effect of NaCl on the response time of AND logic gate in the presence of both GSH and  $\text{Pb}^{2+}$  ions.

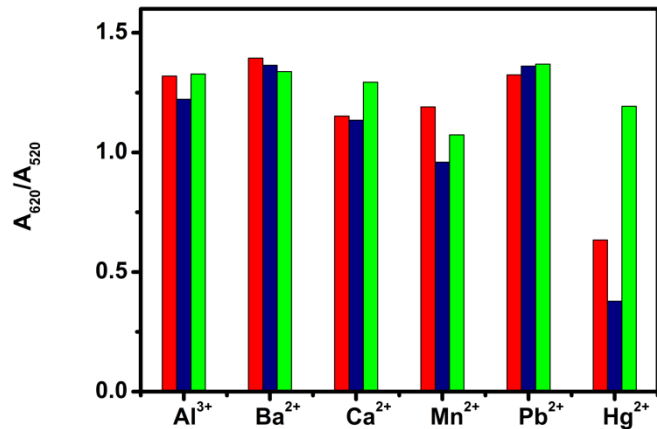

**Figure S4.** The effect of the input adding order on the logic output. Red: simultaneous addition of GSH and metal ions. Blue: metal ions were added first then GSH was added. Green: GSH was added first then metal ions were added.
